# Supplementary material for: Functional heterogeneity within the rodent lateral orbitofrontal cortex dissociates outcome devaluation and reversal learning deficits
Source: eLife journal article supplement (doi:10.7554/elife.37357), 2018-07-25
Supplement: supp [file elife-37357-supp-v1.zip]

Archive with 4 entries (4 files):
- elife_poa_e37357_Figure_1_figure_supplement_1.pdf
- elife_poa_e37357_Transparent_reporting.docx
- elife_poa_e37357_Figure_2_figure_supplement_2.pdf
- elife_poa_e37357_Figure_2_figure_supplement_1.pdf
