# Supplementary figures and images for: Functional heterogeneity within the rodent lateral orbitofrontal cortex dissociates outcome devaluation and reversal learning deficits
Source: eLife journal article supplement (doi:10.7554/elife.37357), 2018-07-25

# Devaluation Test

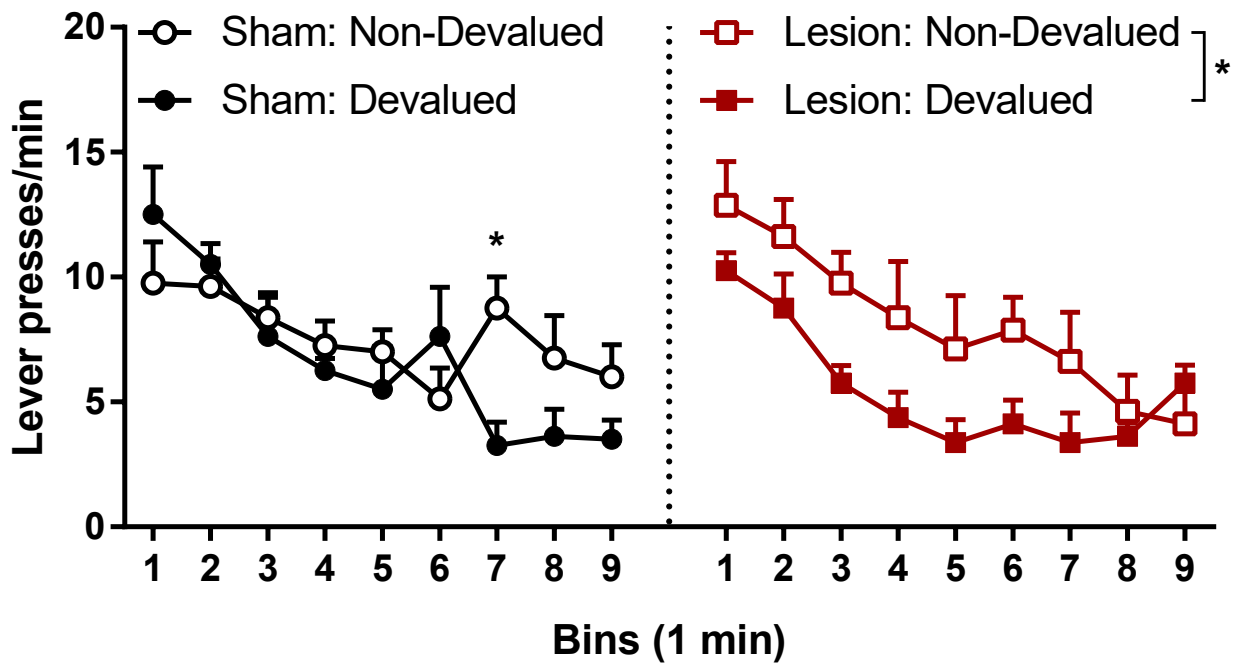

Supplement: supp [file elife-37357-supp-v1.zip]

## Sham

## Anterior

## Posterior

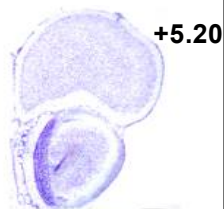

+5.20

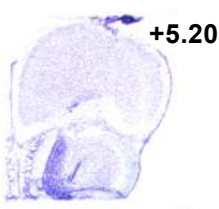

+5.20

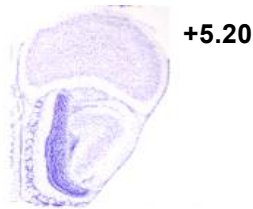

+5.20

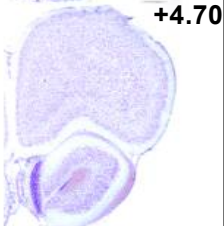

+4.70

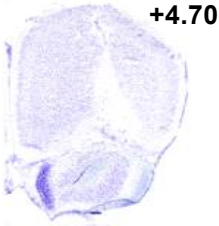

+4.70

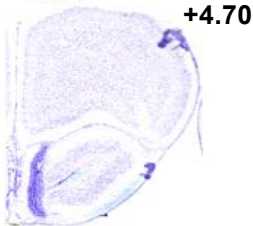

+4.70

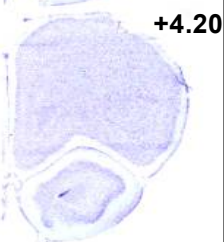

+4.20

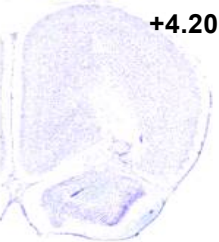

+4.20

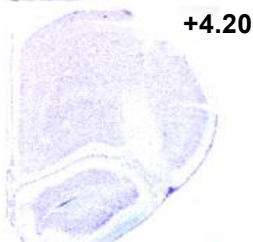

+4.20

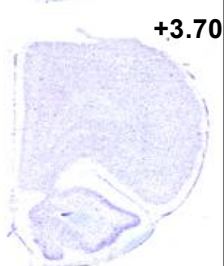

+3.70

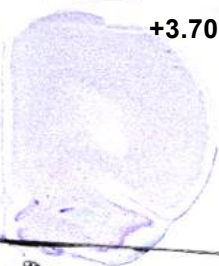

+3.70

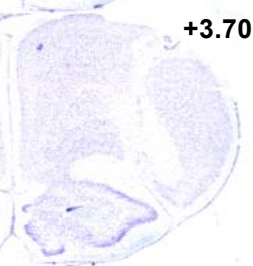

+3.70

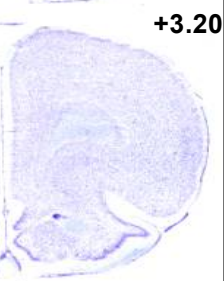

+3.20

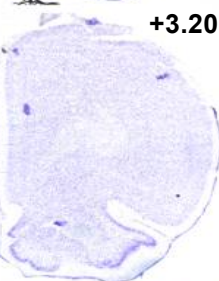

+3.20

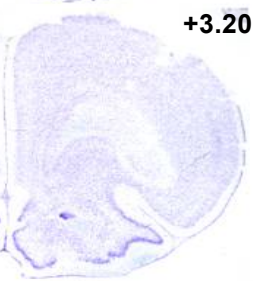

+3.20

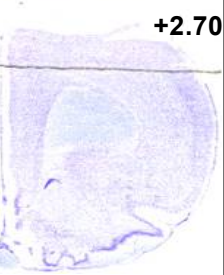

+2.70

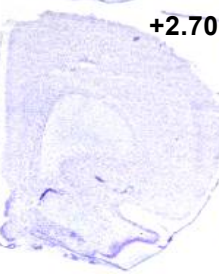

+2.70

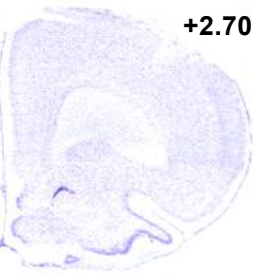

+2.70

Supplement: supp [file elife-37357-supp-v1.zip]

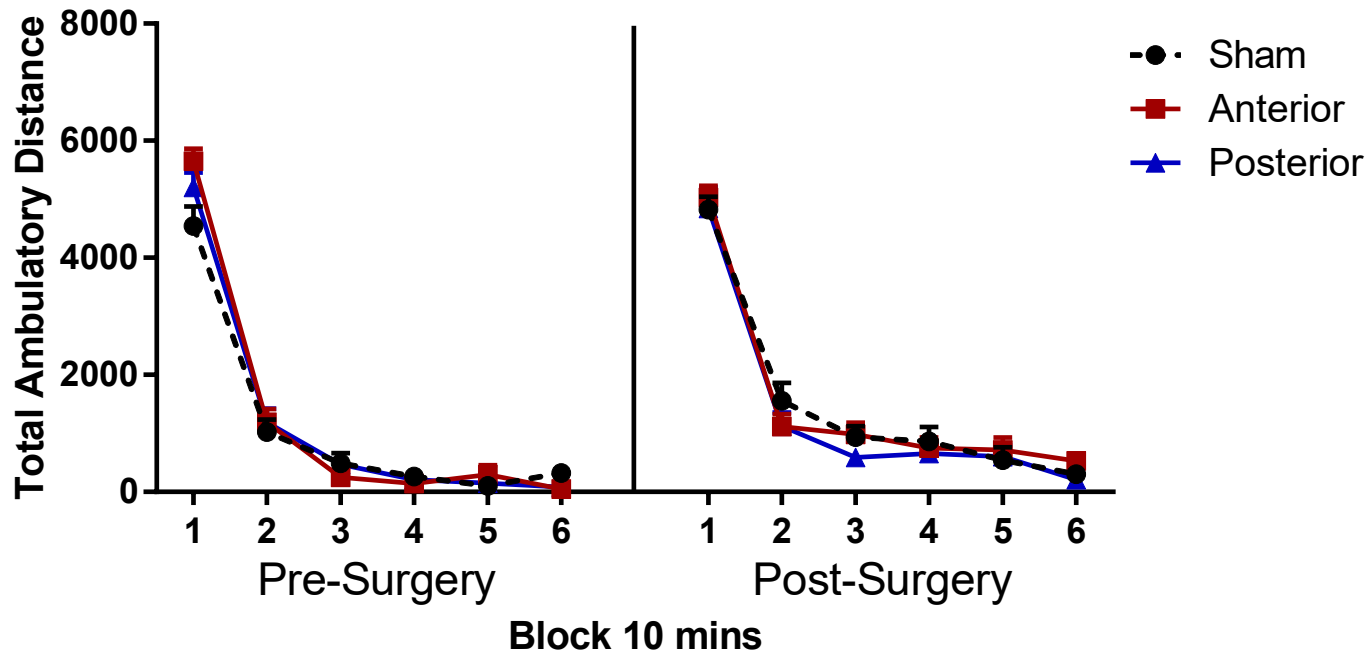

Supplement: supp [file elife-37357-supp-v1.zip]
